# Supplementary material for: Association of Elevated Reward Prediction Error Response With Weight Gain in Adolescent Anorexia Nervosa
Source: Atypon-hosted journal article supplement (doi:10.1176/appi.ajp.2016.16060671), 2017-02-24
Supplement: appi.ajp.2016.16060671.ds001.pdf [file appi.ajp.2016.16060671.ds001.pdf]

Data supplement for DeGuzman et al., Association of Elevated Reward Prediction Error Response With Weight Gain in Adolescent Anorexia Nervosa. *Am J Psychiatry* (doi: 10.1176/appi.ajp.2016.16060671)

## **Supplemental Material**

1. Figure S1: Monetary Reward Task Paradigm
2. Figure S2: Brain Volume Measures
3. Figure S3: Sensitivity to Reward and Punishment Between Groups
4. Table S1: Parameter estimates across scans and task conditions
5. Table S2: Parameter estimates across scans and task conditions excluding 1 anorexia nervosa binge subtype patient
6. Table S3: Parameter estimates across scans and task conditions excluding 5 patients with anorexia nervosa on antipsychotics
7. Table S4: Expectation and Sensitivity to Reward/Punishment Correlations
8. Further studies to identify the effect of high versus low PE brain response and in relation to BMI
9. Temporal difference learning algorithm and rationale for temporal difference model learning rate selection
10. References

## Figure S1. Monetary Reward Task Paradigm<sup>a</sup>

### A. Learned Associations

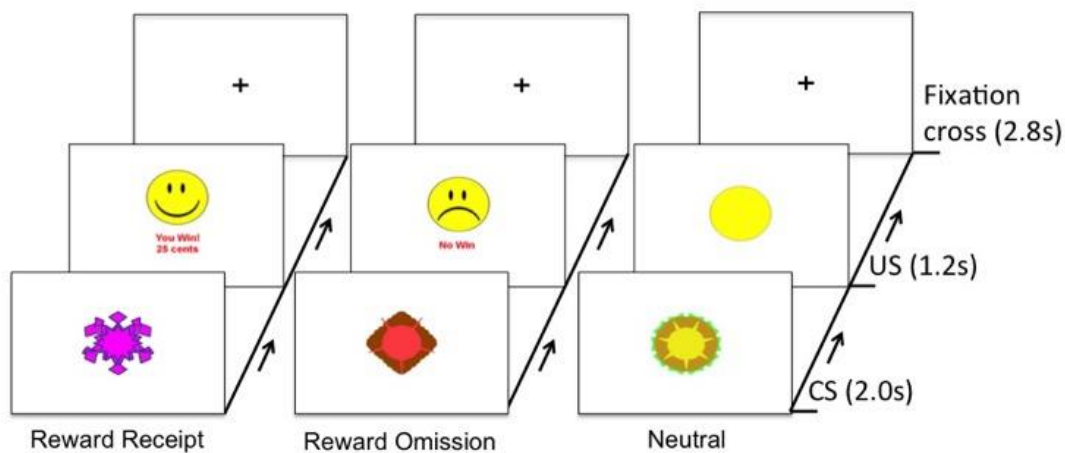

### B. Unexpected conditions

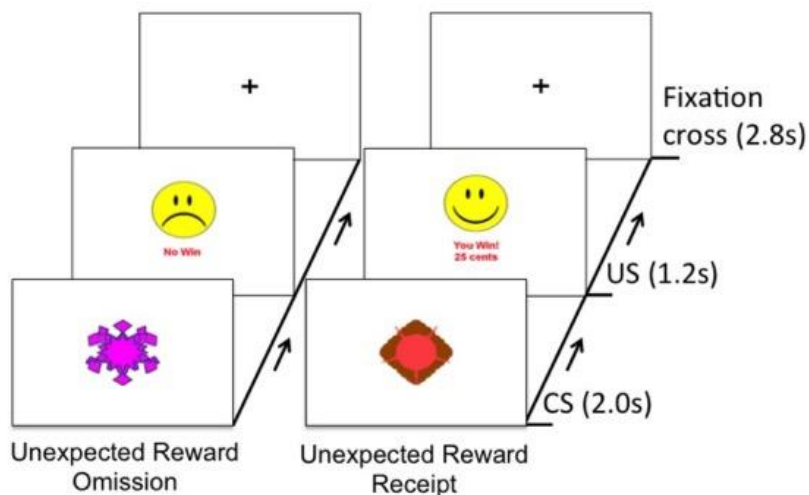

<sup>a</sup>Panel A depicts the learned associations between the conditioned stimulus (CS, colored geometric shape, presented for 2.8 seconds (s)) and the unconditioned stimulus (US, money reward, presented for 1.2s). Intertrial interval was 6s. Panel B depicts the unexpected conditions where learned associations were violated during 20% of the trials.

**Figure S2. Brain Volume Measures<sup>a</sup>**

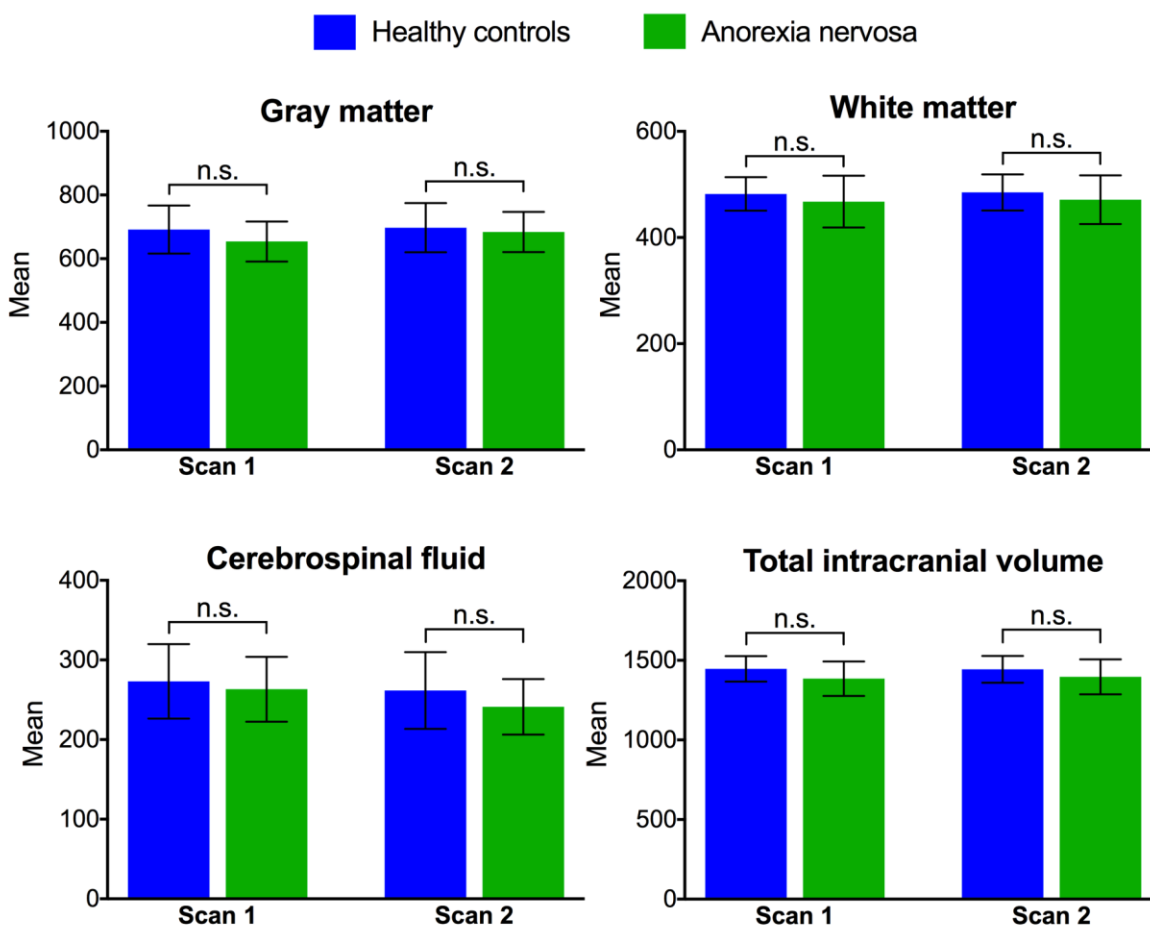

<sup>a</sup>Bar graphs depict brain volume differences between groups were not significant (n.s.) for whole brain gray matter, white matter, cerebrospinal fluid, or total intracranial volume. Healthy control means (N=21) are indicated by blue bars, anorexia nervosa group means (N=21) are indicated by green bars. Error bars = +/- 1 standard error of the mean.

**Figure S3. Sensitivity to Reward and Punishment between groups<sup>a</sup>**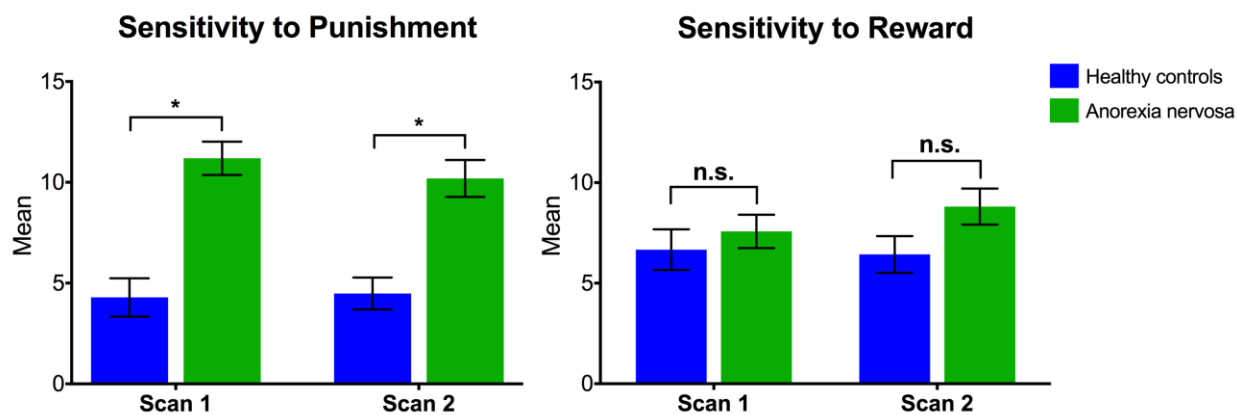

<sup>a</sup>Independent t-tests revealed sensitivity to punishment was significantly higher in the anorexia nervosa group at both time points, while the difference in sensitivity to reward was not significant (n.s.) between groups at either time point. Healthy control means (N=21) are indicated by blue bars, anorexia nervosa means (N=21) are indicated by green bars. Error bars indicate +/- 1 standard error.

\* $p < 0.001$

Table S1. Parameter estimates across scans and task conditions.

|                     |                                     | Scan 1                  |                 |                         |       |                     |                |            | Scan 2                  |       |                         |       |          |       |            | Mixed ANCOVA Group Effect |       |            |
|---------------------|-------------------------------------|-------------------------|-----------------|-------------------------|-------|---------------------|----------------|------------|-------------------------|-------|-------------------------|-------|----------|-------|------------|---------------------------|-------|------------|
|                     |                                     | Healthy Controls (n=21) |                 | Anorexia Nervosa (n=21) |       | ANCOVA <sup>a</sup> |                |            | Healthy Controls (n=21) |       | Anorexia Nervosa (n=21) |       | ANCOVA   |       |            |                           |       |            |
| Condition           | Region of Interest <sup>b</sup>     | Mean                    | SD <sup>c</sup> | Mean                    | SD    | F (1,35)            | p <sup>d</sup> | $\eta_p^2$ | Mean                    | SD    | Mean                    | SD    | F (1,35) | p     | $\eta_p^2$ | F (1,35)                  | p     | $\eta_p^2$ |
| Expectation         | R caudate body                      | 19.05                   | 12.75           | 23.95                   | 11.54 | 1.39                | 0.246          | 0.04       | 20.95                   | 12.56 | 22.05                   | 12.25 | 0.45     | 0.509 | 0.01       | 1.18                      | 0.286 | 0.03       |
|                     | L caudate body                      | 18.71                   | 12.11           | 24.29                   | 12.07 | 2.74                | 0.107          | 0.07       | 20.43                   | 12.55 | 22.57                   | 12.19 | 0.05     | 0.821 | 0.00       | 0.81                      | 0.375 | 0.02       |
|                     | R caudate head                      | 18.10                   | 11.92           | 24.90                   | 11.92 | 2.65                | 0.112          | 0.07       | 20.43                   | 14.15 | 22.57                   | 10.28 | 0.08     | 0.785 | 0.00       | 1.11                      | 0.299 | 0.03       |
|                     | L caudate head                      | 20.52                   | 13.11           | 22.48                   | 11.60 | 0.68                | 0.416          | 0.02       | 21.43                   | 12.58 | 21.57                   | 12.26 | 0.49     | 0.488 | 0.01       | 0.00                      | 0.947 | 0.00       |
|                     | R inferior orbitofrontal cortex     | 21.14                   | 12.27           | 21.86                   | 12.56 | 0.13                | 0.721          | 0.00       | 20.57                   | 11.20 | 22.43                   | 13.46 | 0.11     | 0.746 | 0.00       | 0.18                      | 0.675 | 0.01       |
|                     | L inferior orbitofrontal cortex     | 21.57                   | 11.92           | 21.43                   | 12.90 | 0.18                | 0.672          | 0.01       | 21.38                   | 11.82 | 21.62                   | 12.99 | 0.00     | 0.968 | 0.00       | 0.07                      | 0.786 | 0.00       |
|                     | R medial orbitofrontal cortex       | 22.00                   | 11.32           | 21.00                   | 13.41 | 0.00                | 0.968          | 0.00       | 22.00                   | 11.42 | 21.00                   | 13.32 | 0.48     | 0.494 | 0.01       | 0.76                      | 0.388 | 0.02       |
|                     | L medial orbitofrontal cortex       | 23.24                   | 11.25           | 19.76                   | 13.25 | 0.12                | 0.733          | 0.00       | 20.48                   | 10.67 | 22.52                   | 13.88 | 1.57     | 0.219 | 0.04       | 1.28                      | 0.266 | 0.04       |
|                     | R middle orbitofrontal cortex       | 20.19                   | 12.38           | 22.81                   | 12.32 | 1.88                | 0.179          | 0.05       | 21.86                   | 12.80 | 21.14                   | 12.02 | 0.09     | 0.765 | 0.00       | 0.62                      | 0.435 | 0.02       |
|                     | L middle orbitofrontal cortex       | 20.00                   | 11.86           | 23.00                   | 12.77 | 0.30                | 0.590          | 0.01       | 21.48                   | 11.48 | 21.52                   | 13.29 | 0.02     | 0.898 | 0.00       | 0.04                      | 0.843 | 0.00       |
|                     | R dorsal anterior insula            | 20.05                   | 12.55           | 22.95                   | 12.11 | 2.62                | 0.114          | 0.07       | 20.81                   | 12.94 | 22.19                   | 11.83 | 0.12     | 0.729 | 0.00       | 1.29                      | 0.263 | 0.04       |
|                     | L dorsal anterior insula            | 20.10                   | 12.93           | 22.90                   | 11.71 | 0.65                | 0.425          | 0.02       | 21.86                   | 12.11 | 21.14                   | 12.71 | 0.11     | 0.738 | 0.00       | 0.06                      | 0.811 | 0.00       |
|                     | R posterior insula                  | 18.10                   | 12.34           | 24.90                   | 11.49 | 3.62                | 0.065          | 0.09       | 18.67                   | 13.17 | 24.33                   | 10.87 | 2.51     | 0.122 | 0.07       | 6.24                      | 0.017 | 0.15       |
|                     | L posterior insula                  | 19.90                   | 12.89           | 23.10                   | 11.71 | 3.47                | 0.071          | 0.09       | 19.57                   | 13.43 | 23.43                   | 10.97 | 1.19     | 0.282 | 0.03       | 2.78                      | 0.105 | 0.07       |
|                     | R ventral anterior insula           | 21.14                   | 12.68           | 21.86                   | 12.14 | 0.59                | 0.447          | 0.02       | 20.76                   | 12.57 | 22.24                   | 12.23 | 0.01     | 0.932 | 0.00       | 0.22                      | 0.643 | 0.01       |
|                     | L ventral anterior insula           | 19.95                   | 13.22           | 23.05                   | 11.35 | 1.27                | 0.267          | 0.04       | 21.52                   | 12.56 | 21.48                   | 12.28 | 0.00     | 0.990 | 0.00       | 0.30                      | 0.585 | 0.01       |
|                     | R ventral caudate/nucleus accumbens | 19.95                   | 12.83           | 23.05                   | 11.78 | 0.31                | 0.579          | 0.01       | 21.95                   | 14.33 | 21.05                   | 10.14 | 0.40     | 0.532 | 0.01       | 0.06                      | 0.811 | 0.00       |
|                     | L ventral caudate/nucleus accumbens | 19.48                   | 12.87           | 23.52                   | 11.59 | 0.50                | 0.486          | 0.01       | 21.52                   | 12.41 | 21.48                   | 12.43 | 1.71     | 0.199 | 0.05       | 0.47                      | 0.500 | 0.01       |
| R substantia nigra  | 21.38                               | 14.17                   | 21.62           | 10.38                   | 0.34  | 0.564               | 0.01           | 23.48      | 14.14                   | 19.52 | 10.02                   | 1.20  | 0.281    | 0.03  | 0.28       | 0.599                     | 0.01  |            |
| L substantia nigra  | 21.14                               | 12.18                   | 21.86           | 12.64                   | 0.02  | 0.877               | 0.00           | 22.24      | 13.33                   | 20.76 | 11.38                   | 0.18  | 0.671    | 0.01  | 0.19       | 0.664                     | 0.01  |            |
| Unexpected omission | R caudate body                      | 19.33                   | 11.80           | 23.67                   | 12.63 | 3.11                | 0.086          | 0.08       | 20.33                   | 11.67 | 22.67                   | 13.02 | 0.76     | 0.389 | 0.02       | 3.25                      | 0.080 | 0.08       |
|                     | L caudate body                      | 17.90                   | 11.53           | 25.10                   | 12.19 | 4.91                | 0.033          | 0.12       | 17.90                   | 11.50 | 25.10                   | 12.21 | 3.31     | 0.077 | 0.09       | 6.77                      | 0.014 | 0.16       |
|                     | R caudate head                      | 20.14                   | 11.72           | 22.86                   | 12.93 | 0.11                | 0.747          | 0.00       | 19.48                   | 13.08 | 23.52                   | 11.35 | 0.33     | 0.567 | 0.01       | 0.44                      | 0.511 | 0.01       |
|                     | L caudate head                      | 20.00                   | 12.90           | 23.00                   | 11.72 | 0.08                | 0.785          | 0.00       | 18.29                   | 12.33 | 24.71                   | 11.62 | 1.40     | 0.245 | 0.04       | 1.08                      | 0.306 | 0.03       |

|                           |                                     |       |       |       |       |      |       |      |       |       |       |       |      |       |      |       |       |      |
|---------------------------|-------------------------------------|-------|-------|-------|-------|------|-------|------|-------|-------|-------|-------|------|-------|------|-------|-------|------|
|                           | R inferior orbitofrontal cortex     | 19.38 | 12.35 | 23.62 | 12.11 | 1.94 | 0.173 | 0.05 | 19.81 | 10.67 | 23.19 | 13.74 | 0.02 | 0.900 | 0.00 | 0.37  | 0.549 | 0.01 |
|                           | L inferior orbitofrontal cortex     | 20.67 | 11.06 | 22.33 | 13.60 | 0.72 | 0.403 | 0.02 | 19.76 | 10.72 | 23.24 | 13.68 | 0.27 | 0.606 | 0.01 | 1.03  | 0.318 | 0.03 |
|                           | R medial orbitofrontal cortex       | 22.33 | 10.79 | 20.67 | 13.81 | 1.99 | 0.168 | 0.05 | 17.81 | 11.77 | 25.19 | 11.89 | 1.77 | 0.192 | 0.05 | 2.50  | 0.123 | 0.07 |
|                           | L medial orbitofrontal cortex       | 22.19 | 11.24 | 20.81 | 13.46 | 2.21 | 0.147 | 0.06 | 17.95 | 10.82 | 25.05 | 12.85 | 2.44 | 0.127 | 0.07 | 2.73  | 0.107 | 0.07 |
|                           | R middle orbitofrontal cortex       | 23.81 | 11.62 | 19.19 | 12.74 | 0.07 | 0.793 | 0.00 | 22.14 | 11.54 | 20.86 | 13.21 | 0.74 | 0.396 | 0.02 | 0.77  | 0.385 | 0.02 |
|                           | L middle orbitofrontal cortex       | 21.52 | 10.94 | 21.48 | 13.74 | 0.38 | 0.541 | 0.01 | 21.05 | 12.46 | 21.95 | 12.37 | 0.02 | 0.896 | 0.00 | 0.00  | 0.960 | 0.00 |
|                           | R dorsal anterior insula            | 19.38 | 12.38 | 23.62 | 12.07 | 2.13 | 0.153 | 0.06 | 18.29 | 12.22 | 24.71 | 11.72 | 0.81 | 0.375 | 0.02 | 2.13  | 0.153 | 0.06 |
|                           | L dorsal anterior insula            | 20.81 | 11.87 | 22.19 | 12.91 | 1.49 | 0.230 | 0.04 | 18.43 | 11.53 | 24.57 | 12.48 | 1.85 | 0.182 | 0.05 | 2.65  | 0.112 | 0.07 |
|                           | R posterior insula                  | 19.33 | 12.38 | 23.67 | 12.06 | 2.11 | 0.155 | 0.06 | 19.10 | 12.87 | 23.90 | 11.44 | 1.32 | 0.258 | 0.04 | 2.12  | 0.155 | 0.06 |
|                           | L posterior insula                  | 20.33 | 12.89 | 22.67 | 11.81 | 3.76 | 0.061 | 0.10 | 18.67 | 14.00 | 24.33 | 9.77  | 1.97 | 0.170 | 0.05 | 3.85  | 0.058 | 0.10 |
|                           | R ventral anterior insula           | 19.29 | 12.07 | 23.71 | 12.35 | 1.54 | 0.223 | 0.04 | 18.48 | 11.73 | 24.52 | 12.32 | 0.74 | 0.396 | 0.02 | 1.38  | 0.248 | 0.04 |
|                           | L ventral anterior insula           | 20.76 | 11.53 | 22.24 | 13.21 | 2.03 | 0.163 | 0.06 | 18.95 | 11.85 | 24.05 | 12.43 | 2.16 | 0.150 | 0.06 | 2.76  | 0.105 | 0.07 |
|                           | R ventral caudate/nucleus accumbens | 20.00 | 11.46 | 23.00 | 13.13 | 0.89 | 0.352 | 0.03 | 18.48 | 11.80 | 24.52 | 12.25 | 2.01 | 0.165 | 0.05 | 1.77  | 0.192 | 0.05 |
|                           | L ventral caudate/nucleus accumbens | 19.67 | 12.41 | 23.33 | 12.15 | 0.21 | 0.652 | 0.01 | 17.24 | 11.45 | 25.76 | 11.80 | 2.85 | 0.101 | 0.08 | 1.74  | 0.196 | 0.05 |
|                           | R substantia nigra                  | 21.81 | 13.98 | 21.19 | 10.63 | 0.48 | 0.493 | 0.01 | 21.24 | 12.74 | 21.76 | 12.08 | 0.42 | 21.76 | 0.01 | 0.59  | 0.449 | 0.02 |
|                           | L substantia nigra                  | 21.76 | 11.89 | 21.24 | 12.93 | 0.02 | 0.902 | 0.00 | 20.38 | 10.69 | 22.62 | 13.84 | 0.39 | 22.62 | 0.01 | 0.38  | 0.541 | 0.01 |
| <b>Unexpected receipt</b> | R caudate body                      | 20.24 | 11.53 | 22.76 | 13.12 | 1.35 | 0.254 | 0.04 | 19.90 | 10.99 | 23.10 | 13.51 | 2.04 | 0.163 | 0.06 | 2.09  | 0.157 | 0.06 |
|                           | L caudate body                      | 20.86 | 11.73 | 22.14 | 13.04 | 1.11 | 0.299 | 0.03 | 18.81 | 12.41 | 24.19 | 11.81 | 3.08 | 0.088 | 0.08 | 2.04  | 0.162 | 0.06 |
|                           | R caudate head                      | 20.19 | 12.69 | 22.81 | 11.99 | 0.91 | 0.347 | 0.03 | 19.29 | 12.54 | 23.71 | 11.87 | 1.46 | 0.234 | 0.04 | 1.47  | 0.233 | 0.04 |
|                           | L caudate head                      | 21.43 | 12.12 | 21.57 | 12.71 | 0.17 | 0.683 | 0.01 | 18.71 | 11.43 | 24.29 | 12.71 | 1.97 | 0.169 | 0.05 | 0.40  | 0.532 | 0.01 |
|                           | R inferior orbitofrontal cortex     | 18.62 | 12.72 | 24.38 | 11.37 | 0.64 | 0.429 | 0.02 | 19.76 | 11.47 | 23.24 | 13.06 | 0.57 | 0.456 | 0.02 | 1.01  | 0.321 | 0.03 |
|                           | L inferior orbitofrontal cortex     | 19.95 | 11.69 | 23.05 | 12.92 | 0.25 | 0.620 | 0.01 | 22.05 | 10.59 | 20.95 | 13.99 | 0.01 | 0.917 | 0.00 | 0.19  | 0.664 | 0.01 |
|                           | R medial orbitofrontal cortex       | 21.48 | 12.24 | 21.52 | 12.60 | 1.13 | 0.296 | 0.03 | 20.24 | 11.61 | 22.76 | 13.05 | 0.62 | 0.436 | 0.02 | 1.02  | 0.319 | 0.03 |
|                           | L medial orbitofrontal cortex       | 21.52 | 11.78 | 21.48 | 13.03 | 1.53 | 0.225 | 0.04 | 21.43 | 11.50 | 21.57 | 13.27 | 0.75 | 0.394 | 0.02 | 1.74  | 0.196 | 0.05 |
|                           | R middle orbitofrontal cortex       | 22.24 | 12.64 | 20.76 | 12.15 | 0.33 | 0.570 | 0.01 | 20.38 | 12.04 | 22.62 | 12.68 | 0.17 | 0.680 | 0.01 | 0.00  | 0.989 | 0.00 |
|                           | L middle orbitofrontal cortex       | 21.29 | 12.41 | 21.71 | 12.42 | 0.33 | 0.569 | 0.01 | 21.00 | 12.03 | 22.00 | 12.78 | 0.23 | 0.632 | 0.01 | 0.38  | 0.542 | 0.01 |
|                           | R dorsal anterior insula            | 18.43 | 12.29 | 24.57 | 11.73 | 5.90 | 0.020 | 0.14 | 18.86 | 12.17 | 24.14 | 12.07 | 7.35 | 0.010 | 0.17 | 10.19 | 0.003 | 0.23 |
|                           | L dorsal anterior insula            | 22.33 | 11.01 | 20.67 | 13.64 | 1.35 | 0.253 | 0.04 | 19.10 | 11.36 | 23.90 | 12.93 | 5.67 | 0.023 | 0.14 | 4.48  | 0.042 | 0.11 |
|                           | R posterior insula                  | 17.33 | 11.66 | 25.67 | 11.66 | 5.17 | 0.029 | 0.13 | 20.81 | 11.99 | 22.19 | 12.79 | 1.50 | 0.229 | 0.04 | 4.68  | 0.037 | 0.12 |
|                           | L posterior insula                  | 20.43 | 11.54 | 22.57 | 13.16 | 1.21 | 0.279 | 0.03 | 20.95 | 12.74 | 22.05 | 12.07 | 0.18 | 0.674 | 0.01 | 0.47  | 0.496 | 0.01 |

|                         |                                     |       |       |       |       |       |       |       |       |       |       |       |       |       |      |       |       |      |
|-------------------------|-------------------------------------|-------|-------|-------|-------|-------|-------|-------|-------|-------|-------|-------|-------|-------|------|-------|-------|------|
|                         | R ventral anterior insula           | 20.10 | 12.30 | 22.90 | 12.37 | 1.95  | 0.172 | 0.05  | 18.95 | 11.80 | 24.05 | 12.48 | 4.19  | 0.048 | 0.11 | 4.39  | 0.044 | 0.11 |
|                         | L ventral anterior insula           | 23.19 | 10.53 | 19.81 | 13.84 | 0.11  | 0.744 | 0.00  | 21.24 | 11.83 | 21.76 | 12.98 | 1.12  | 0.297 | 0.03 | 0.48  | 0.492 | 0.01 |
|                         | R ventral caudate/nucleus accumbens | 19.90 | 11.87 | 23.10 | 12.74 | 0.74  | 0.395 | 0.02  | 19.05 | 10.81 | 23.95 | 13.38 | 3.33  | 0.077 | 0.09 | 3.48  | 0.071 | 0.09 |
|                         | L ventral caudate/nucleus accumbens | 22.10 | 11.84 | 20.90 | 12.95 | 0.35  | 0.556 | 0.01  | 19.00 | 11.48 | 24.00 | 12.79 | 1.83  | 0.184 | 0.05 | 0.20  | 0.659 | 0.01 |
|                         | R substantia nigra                  | 21.57 | 12.11 | 21.43 | 12.73 | 0.28  | 0.600 | 0.01  | 22.19 | 12.07 | 20.81 | 12.72 | 0.00  | 0.969 | 0.00 | 0.02  | 0.876 | 0.00 |
|                         | L substantia nigra                  | 18.86 | 12.36 | 24.14 | 11.88 | 1.58  | 0.218 | 0.04  | 19.95 | 13.11 | 23.05 | 11.47 | 0.19  | 0.665 | 0.01 | 1.04  | 0.315 | 0.03 |
| <b>Prediction Error</b> | R caudate body                      | 19.00 | 12.79 | 24.00 | 11.48 | 6.89  | 0.013 | 0.16  | 19.05 | 13.24 | 23.95 | 10.98 | 3.59  | 0.066 | 0.09 | 6.54  | 0.015 | 0.16 |
|                         | L caudate body                      | 19.24 | 12.48 | 23.76 | 11.92 | 5.32  | 0.027 | 0.13  | 19.24 | 12.12 | 23.76 | 12.28 | 3.68  | 0.063 | 0.10 | 7.78  | 0.009 | 0.18 |
|                         | R caudate head                      | 18.24 | 12.70 | 24.76 | 11.17 | 5.94  | 0.020 | 0.15  | 19.10 | 13.59 | 23.90 | 10.56 | 0.85  | 0.363 | 0.02 | 4.54  | 0.040 | 0.11 |
|                         | L caudate head                      | 19.86 | 12.32 | 23.14 | 12.29 | 0.15  | 0.704 | 0.00  | 18.90 | 12.44 | 24.10 | 11.82 | 3.04  | 0.090 | 0.08 | 3.15  | 0.084 | 0.08 |
|                         | R inferior orbitofrontal cortex     | 18.90 | 12.67 | 24.10 | 11.57 | 3.30  | 0.078 | 0.09  | 20.67 | 11.40 | 22.33 | 13.31 | 0.44  | 0.513 | 0.01 | 1.96  | 0.171 | 0.05 |
|                         | L inferior orbitofrontal cortex     | 22.29 | 11.48 | 20.71 | 13.25 | 0.01  | 0.916 | 0.00  | 21.29 | 12.27 | 21.71 | 12.56 | 0.04  | 0.836 | 0.00 | 0.01  | 0.938 | 0.00 |
|                         | R medial orbitofrontal cortex       | 20.43 | 11.62 | 22.57 | 13.08 | 3.39  | 0.074 | 0.09  | 23.29 | 13.27 | 19.71 | 11.21 | 0.26  | 0.614 | 0.01 | 0.59  | 0.447 | 0.02 |
|                         | L medial orbitofrontal cortex       | 19.81 | 11.92 | 23.19 | 12.67 | 3.70  | 0.062 | 0.10  | 23.33 | 12.62 | 19.67 | 11.93 | 0.01  | 0.940 | 0.00 | 1.12  | 0.297 | 0.03 |
|                         | R middle orbitofrontal cortex       | 22.43 | 12.06 | 20.57 | 12.69 | 0.11  | 0.743 | 0.00  | 23.00 | 11.75 | 20.00 | 12.88 | 1.64  | 0.209 | 0.05 | 1.35  | 0.253 | 0.04 |
|                         | L middle orbitofrontal cortex       | 20.90 | 11.28 | 22.10 | 13.43 | 0.04  | 0.852 | 0.00  | 21.33 | 11.64 | 21.67 | 13.15 | 0.58  | 0.453 | 0.02 | 0.46  | 0.501 | 0.01 |
|                         | R dorsal anterior insula            | 19.33 | 12.10 | 23.67 | 12.34 | 8.41  | 0.006 | 0.19  | 19.57 | 11.51 | 23.43 | 12.97 | 3.16  | 0.084 | 0.08 | 7.85  | 0.008 | 0.18 |
|                         | L dorsal anterior insula            | 20.29 | 12.53 | 22.71 | 12.18 | 1.78  | 0.191 | 0.05  | 20.43 | 12.71 | 22.57 | 12.02 | 0.91  | 0.346 | 0.03 | 2.75  | 0.106 | 0.07 |
|                         | R posterior insula                  | 19.00 | 12.89 | 24.00 | 11.37 | 5.36  | 0.027 | 0.13  | 19.19 | 13.66 | 23.81 | 10.52 | 2.52  | 0.121 | 0.07 | 4.44  | 0.042 | 0.11 |
|                         | L posterior insula                  | 20.19 | 12.43 | 22.81 | 12.27 | 9.02  | 0.005 | 0.21  | 19.38 | 13.66 | 23.62 | 10.61 | 1.85  | 0.183 | 0.05 | 5.08  | 0.031 | 0.13 |
|                         | R ventral anterior insula           | 20.38 | 12.57 | 22.62 | 12.16 | 4.76  | 0.036 | 0.12  | 19.05 | 11.06 | 23.95 | 13.17 | 2.99  | 0.093 | 0.08 | 5.08  | 0.031 | 0.13 |
|                         | L ventral anterior insula           | 21.86 | 11.73 | 21.14 | 13.07 | 1.23  | 0.275 | 0.03  | 20.86 | 11.85 | 22.14 | 12.94 | 1.05  | 0.314 | 0.03 | 1.73  | 0.197 | 0.05 |
|                         | R ventral caudate/nucleus accumbens | 18.10 | 12.72 | 24.90 | 11.06 | 6.94  | 0.012 | 0.17  | 19.57 | 13.07 | 23.43 | 11.40 | 1.26  | 0.270 | 0.04 | 6.63  | 0.014 | 0.16 |
|                         | L ventral caudate/nucleus accumbens | 19.57 | 12.34 | 23.43 | 12.19 | 1.60  | 0.215 | 0.04  | 19.76 | 13.16 | 23.24 | 11.36 | 0.97  | 0.331 | 0.03 | 3.19  | 0.083 | 0.08 |
|                         | R substantia nigra                  | 21.62 | 11.79 | 21.38 | 13.02 | 0.14  | 0.708 | 0.00  | 21.48 | 12.75 | 21.52 | 12.08 | 0.08  | 0.773 | 0.00 | 0.34  | 0.563 | 0.01 |
| L substantia nigra      | 20.76                               | 12.22 | 22.24 | 12.57 | 0.28  | 0.601 | 0.01  | 21.38 | 13.02 | 21.62 | 11.78 | 0.07  | 0.800 | 0.00  | 0.08 | 0.778 | 0.00  |      |

<sup>a</sup>ANCOVA=Analysis of covariance; <sup>b</sup>R=right, L=left; <sup>c</sup>SD=Standard deviation; <sup>d</sup>p-values are adjusted for Bonferroni multiple comparisons; the gray shaded rows indicate significant group difference for regions that also showed significant group effect in the mixed ANOVA.

Table S2: Parameter estimates across scans and task conditions excluding 1 anorexia nervosa-binge subtype patient

|                     |                                     | Scan 1                  |                 |                         |       |                     |                |                | Scan 2                  |       |                         |       |          |       |                | Mixed ANCOVA Group Effect |       |                |
|---------------------|-------------------------------------|-------------------------|-----------------|-------------------------|-------|---------------------|----------------|----------------|-------------------------|-------|-------------------------|-------|----------|-------|----------------|---------------------------|-------|----------------|
|                     |                                     | Healthy Controls (n=21) |                 | Anorexia Nervosa (n=20) |       | ANCOVA <sup>a</sup> |                |                | Healthy Controls (n=21) |       | Anorexia Nervosa (n=20) |       | ANCOVA   |       |                |                           |       |                |
| Condition           | Region of Interest <sup>b</sup>     | Mean                    | SD <sup>c</sup> | Mean                    | SD    | F (1,34)            | p <sup>d</sup> | η <sup>2</sup> | Mean                    | SD    | Mean                    | SD    | F (1,34) | p     | η <sup>2</sup> | F (1,34)                  | p     | η <sup>2</sup> |
| Expectation         | R caudate body                      | 18.43                   | 12.34           | 23.70                   | 11.27 | 1.50                | 0.229          | 0.04           | 20.00                   | 12.49 | 22.05                   | 11.65 | 0.39     | 0.537 | 0.01           | 1.12                      | 0.297 | 0.03           |
|                     | L caudate body                      | 17.76                   | 12.04           | 24.40                   | 11.22 | 2.92                | 0.097          | 0.08           | 19.43                   | 12.55 | 22.65                   | 11.43 | 0.03     | 0.859 | 0.00           | 0.75                      | 0.393 | 0.02           |
|                     | R caudate head                      | 17.86                   | 11.59           | 24.30                   | 11.76 | 2.56                | 0.119          | 0.07           | 19.67                   | 13.86 | 22.40                   | 9.79  | 0.04     | 0.846 | 0.00           | 0.95                      | 0.337 | 0.03           |
|                     | L caudate head                      | 20.24                   | 12.75           | 21.80                   | 11.39 | 0.70                | 0.408          | 0.02           | 20.43                   | 12.58 | 21.60                   | 11.61 | 0.59     | 0.449 | 0.02           | 0.01                      | 0.937 | 0.00           |
|                     | R inferior orbitofrontal cortex     | 20.43                   | 11.88           | 21.60                   | 12.36 | 0.13                | 0.718          | 0.00           | 19.81                   | 10.88 | 22.25                   | 13.20 | 0.09     | 0.761 | 0.00           | 0.16                      | 0.693 | 0.01           |
|                     | L inferior orbitofrontal cortex     | 20.81                   | 11.59           | 21.20                   | 12.68 | 0.20                | 0.657          | 0.01           | 20.81                   | 11.41 | 21.20                   | 12.84 | 0.00     | 0.983 | 0.00           | 0.07                      | 0.799 | 0.00           |
|                     | R medial orbitofrontal cortex       | 21.71                   | 10.96           | 20.25                   | 13.21 | 0.00                | 0.986          | 0.00           | 21.19                   | 11.14 | 20.80                   | 13.09 | 0.48     | 0.492 | 0.01           | 0.73                      | 0.400 | 0.02           |
|                     | L medial orbitofrontal cortex       | 22.81                   | 10.81           | 19.10                   | 13.10 | 0.11                | 0.742          | 0.00           | 20.05                   | 10.24 | 22.00                   | 13.77 | 1.56     | 0.220 | 0.04           | 1.28                      | 0.266 | 0.04           |
|                     | R middle orbitofrontal cortex       | 19.43                   | 12.06           | 22.65                   | 11.97 | 1.92                | 0.175          | 0.05           | 21.29                   | 12.36 | 20.70                   | 11.88 | 0.09     | 0.766 | 0.00           | 0.60                      | 0.444 | 0.02           |
|                     | L middle orbitofrontal cortex       | 19.71                   | 11.47           | 22.35                   | 12.64 | 0.25                | 0.617          | 0.01           | 21.10                   | 11.05 | 20.90                   | 13.17 | 0.02     | 0.879 | 0.00           | 0.03                      | 0.872 | 0.00           |
|                     | R dorsal anterior insula            | 19.38                   | 12.16           | 22.70                   | 11.85 | 2.59                | 0.117          | 0.07           | 20.29                   | 12.50 | 21.75                   | 11.68 | 0.11     | 0.739 | 0.00           | 1.25                      | 0.272 | 0.04           |
|                     | L dorsal anterior insula            | 19.52                   | 12.46           | 22.55                   | 11.56 | 0.70                | 0.410          | 0.02           | 21.43                   | 11.69 | 20.55                   | 12.57 | 0.13     | 0.726 | 0.00           | 0.05                      | 0.825 | 0.00           |
|                     | R posterior insula                  | 17.67                   | 11.91           | 24.50                   | 11.30 | 3.69                | 0.063          | 0.10           | 18.29                   | 12.75 | 23.85                   | 10.69 | 2.28     | 0.140 | 0.06           | 5.91                      | 0.020 | 0.15           |
|                     | L posterior insula                  | 19.24                   | 12.50           | 22.85                   | 11.43 | 3.64                | 0.065          | 0.10           | 19.00                   | 12.99 | 23.10                   | 10.74 | 1.15     | 0.292 | 0.03           | 2.72                      | 0.108 | 0.07           |
|                     | R ventral anterior insula           | 20.57                   | 12.24           | 21.45                   | 12.00 | 0.60                | 0.445          | 0.02           | 20.24                   | 12.13 | 21.80                   | 12.08 | 0.01     | 0.924 | 0.00           | 0.20                      | 0.661 | 0.01           |
|                     | L ventral anterior insula           | 19.48                   | 12.77           | 22.60                   | 11.19 | 1.29                | 0.265          | 0.04           | 20.76                   | 12.23 | 21.25                   | 12.02 | 0.00     | 0.987 | 0.00           | 0.30                      | 0.588 | 0.01           |
|                     | R ventral caudate/nucleus accumbens | 19.52                   | 12.39           | 22.55                   | 11.64 | 0.34                | 0.563          | 0.01           | 21.19                   | 14.00 | 20.80                   | 9.78  | 0.45     | 0.509 | 0.01           | 0.07                      | 0.787 | 0.00           |
|                     | L ventral caudate/nucleus accumbens | 19.19                   | 12.48           | 22.90                   | 11.43 | 0.51                | 0.480          | 0.02           | 20.62                   | 12.25 | 21.40                   | 11.99 | 1.86     | 0.181 | 0.05           | 0.53                      | 0.473 | 0.02           |
|                     | R substantia nigra                  | 20.76                   | 13.72           | 21.25                   | 10.19 | 0.34                | 0.563          | 0.01           | 22.62                   | 13.91 | 19.30                   | 9.61  | 1.29     | 0.264 | 0.04           | 0.33                      | 0.568 | 0.01           |
|                     | L substantia nigra                  | 20.38                   | 11.87           | 21.65                   | 12.36 | 0.04                | 0.853          | 0.00           | 21.43                   | 13.05 | 20.55                   | 11.06 | 0.19     | 0.663 | 0.01           | 39.72                     | 0.206 | 0.65           |
| Unexpected omission | R caudate body                      | 18.67                   | 11.43           | 23.45                   | 12.34 | 3.18                | 0.084          | 0.09           | 19.52                   | 11.40 | 22.55                   | 12.66 | 0.74     | 0.396 | 0.02           | 3.18                      | 0.084 | 0.09           |
|                     | L caudate body                      | 17.05                   | 11.33           | 25.15                   | 11.47 | 5.08                | 0.031          | 0.13           | 16.95                   | 11.43 | 25.25                   | 11.29 | 3.30     | 0.078 | 0.09           | 6.91                      | 0.013 | 0.17           |
|                     | R caudate head                      | 19.86                   | 11.36           | 22.20                   | 12.78 | 0.12                | 0.727          | 0.00           | 18.86                   | 12.69 | 23.25                   | 11.05 | 0.30     | 0.590 | 0.01           | 0.43                      | 0.514 | 0.01           |
|                     | L caudate head                      | 19.81                   | 12.64           | 22.25                   | 11.43 | 0.07                | 0.790          | 0.00           | 17.38                   | 12.19 | 24.80                   | 10.77 | 1.33     | 0.257 | 0.04           | 1.00                      | 0.325 | 0.03           |



|                           |                                     |       |       |       |       |      |       |      |       |       |       |       |      |       |      |      |       |      |
|---------------------------|-------------------------------------|-------|-------|-------|-------|------|-------|------|-------|-------|-------|-------|------|-------|------|------|-------|------|
|                           | R inferior orbitofrontal cortex     | 19.14 | 12.02 | 22.95 | 11.92 | 1.90 | 0.177 | 0.05 | 19.52 | 10.30 | 22.55 | 13.62 | 0.01 | 0.906 | 0.00 | 0.38 | 0.544 | 0.01 |
|                           | L inferior orbitofrontal cortex     | 20.05 | 10.65 | 22.00 | 13.44 | 0.74 | 0.397 | 0.02 | 19.57 | 10.41 | 22.50 | 13.54 | 0.27 | 0.605 | 0.01 | 0.95 | 0.336 | 0.03 |
|                           | R medial orbitofrontal cortex       | 21.81 | 10.35 | 20.15 | 13.71 | 2.01 | 0.166 | 0.06 | 17.57 | 11.42 | 24.60 | 11.76 | 1.63 | 0.211 | 0.05 | 2.36 | 0.134 | 0.07 |
|                           | L medial orbitofrontal cortex       | 21.62 | 10.81 | 20.35 | 13.35 | 2.42 | 0.129 | 0.07 | 17.86 | 10.66 | 24.30 | 12.65 | 2.45 | 0.127 | 0.07 | 2.72 | 0.109 | 0.07 |
|                           | R middle orbitofrontal cortex       | 22.90 | 11.45 | 19.00 | 12.49 | 0.06 | 0.813 | 0.00 | 21.52 | 11.13 | 20.45 | 13.08 | 0.78 | 0.383 | 0.02 | 0.82 | 0.372 | 0.02 |
|                           | L middle orbitofrontal cortex       | 21.14 | 10.53 | 20.85 | 13.62 | 0.40 | 0.532 | 0.01 | 20.33 | 12.11 | 21.70 | 12.11 | 0.03 | 0.857 | 0.00 | 0.01 | 0.918 | 0.00 |
|                           | R dorsal anterior insula            | 19.19 | 12.09 | 22.90 | 11.86 | 2.08 | 0.159 | 0.06 | 17.95 | 11.82 | 24.20 | 11.57 | 0.72 | 0.402 | 0.02 | 2.09 | 0.157 | 0.06 |
|                           | L dorsal anterior insula            | 20.38 | 11.41 | 21.65 | 12.81 | 1.39 | 0.247 | 0.04 | 18.29 | 11.30 | 23.85 | 12.29 | 1.92 | 0.175 | 0.05 | 2.65 | 0.113 | 0.07 |
|                           | R posterior insula                  | 18.95 | 11.95 | 23.15 | 11.93 | 2.26 | 0.142 | 0.06 | 18.62 | 12.41 | 23.50 | 11.28 | 1.28 | 0.265 | 0.04 | 2.14 | 0.153 | 0.06 |
|                           | L posterior insula                  | 19.90 | 12.44 | 22.15 | 11.68 | 3.63 | 0.065 | 0.10 | 18.14 | 13.56 | 24.00 | 9.49  | 1.77 | 0.193 | 0.05 | 3.56 | 0.068 | 0.10 |
|                           | R ventral anterior insula           | 19.10 | 11.77 | 23.00 | 12.17 | 1.48 | 0.233 | 0.04 | 18.24 | 11.39 | 23.90 | 12.18 | 0.76 | 0.389 | 0.02 | 1.42 | 0.241 | 0.04 |
|                           | L ventral anterior insula           | 20.48 | 11.13 | 21.55 | 13.08 | 1.93 | 0.174 | 0.05 | 18.62 | 11.43 | 23.50 | 12.32 | 2.12 | 0.155 | 0.06 | 2.70 | 0.110 | 0.07 |
|                           | R ventral caudate/nucleus accumbens | 19.38 | 11.04 | 22.70 | 12.96 | 1.00 | 0.325 | 0.03 | 18.05 | 11.36 | 24.10 | 12.10 | 1.92 | 0.175 | 0.05 | 1.71 | 0.200 | 0.05 |
|                           | L ventral caudate/nucleus accumbens | 19.38 | 12.04 | 22.70 | 11.99 | 0.25 | 0.624 | 0.01 | 16.43 | 11.21 | 25.80 | 11.07 | 2.76 | 0.106 | 0.08 | 1.70 | 0.202 | 0.05 |
|                           | R substantia nigra                  | 21.43 | 13.55 | 20.55 | 10.41 | 0.53 | 0.472 | 0.02 | 20.33 | 12.59 | 21.70 | 11.59 | 0.37 | 0.547 | 0.01 | 0.60 | 0.445 | 0.02 |
|                           | L substantia nigra                  | 21.48 | 11.53 | 20.50 | 12.72 | 0.01 | 0.930 | 0.00 | 19.71 | 10.30 | 22.35 | 13.67 | 0.38 | 0.545 | 0.01 | 0.36 | 0.553 | 0.01 |
| <b>Unexpected receipt</b> | R caudate body                      | 19.24 | 11.53 | 22.85 | 12.45 | 1.45 | 0.236 | 0.04 | 18.90 | 10.99 | 23.20 | 12.85 | 1.98 | 0.168 | 0.06 | 2.03 | 0.164 | 0.06 |
|                           | L caudate body                      | 19.86 | 11.73 | 22.20 | 12.42 | 1.24 | 0.273 | 0.04 | 17.81 | 12.41 | 24.35 | 10.82 | 3.03 | 0.091 | 0.08 | 1.97 | 0.170 | 0.06 |
|                           | R caudate head                      | 19.19 | 12.69 | 22.90 | 11.18 | 0.96 | 0.335 | 0.03 | 18.38 | 12.41 | 23.75 | 11.16 | 1.37 | 0.250 | 0.04 | 1.38 | 0.248 | 0.04 |
|                           | L caudate head                      | 20.57 | 11.89 | 21.45 | 12.36 | 0.19 | 0.663 | 0.01 | 17.71 | 11.43 | 24.45 | 11.84 | 1.91 | 0.177 | 0.05 | 0.33 | 0.568 | 0.01 |
|                           | R inferior orbitofrontal cortex     | 18.10 | 12.28 | 24.05 | 11.15 | 0.60 | 0.444 | 0.02 | 19.10 | 11.10 | 23.00 | 12.81 | 0.55 | 0.465 | 0.02 | 0.92 | 0.344 | 0.03 |
|                           | L inferior orbitofrontal cortex     | 19.19 | 11.38 | 22.90 | 12.58 | 0.28 | 0.602 | 0.01 | 21.43 | 10.19 | 20.55 | 13.87 | 0.01 | 0.940 | 0.00 | 0.19 | 0.662 | 0.01 |
|                           | R medial orbitofrontal cortex       | 20.52 | 12.16 | 21.50 | 12.08 | 1.25 | 0.271 | 0.04 | 19.86 | 11.20 | 22.20 | 12.92 | 0.62 | 0.438 | 0.02 | 0.97 | 0.332 | 0.03 |
|                           | L medial orbitofrontal cortex       | 20.62 | 11.62 | 21.40 | 12.64 | 1.69 | 0.202 | 0.05 | 21.19 | 11.21 | 20.80 | 13.02 | 0.77 | 0.386 | 0.02 | 1.65 | 0.207 | 0.05 |
|                           | R middle orbitofrontal cortex       | 21.38 | 12.42 | 20.60 | 11.81 | 0.34 | 0.563 | 0.01 | 19.76 | 11.64 | 22.30 | 12.49 | 0.17 | 0.686 | 0.01 | 0.00 | 0.953 | 0.00 |
|                           | L middle orbitofrontal cortex       | 20.48 | 12.16 | 21.55 | 12.08 | 0.33 | 0.569 | 0.01 | 20.81 | 11.75 | 21.20 | 12.52 | 0.20 | 0.661 | 0.01 | 0.36 | 0.554 | 0.01 |
|                           | R dorsal anterior insula            | 17.81 | 11.90 | 24.35 | 11.40 | 5.85 | 0.021 | 0.15 | 18.24 | 11.77 | 23.90 | 11.79 | 7.00 | 0.012 | 0.17 | 9.69 | 0.004 | 0.22 |
|                           | L dorsal anterior insula            | 21.67 | 10.61 | 20.30 | 13.51 | 1.37 | 0.250 | 0.04 | 18.43 | 11.01 | 23.70 | 12.63 | 5.46 | 0.026 | 0.14 | 4.36 | 0.044 | 0.11 |
|                           | R posterior insula                  | 16.62 | 11.33 | 25.60 | 11.11 | 5.41 | 0.026 | 0.14 | 20.14 | 11.62 | 21.90 | 12.59 | 1.44 | 0.239 | 0.04 | 4.47 | 0.042 | 0.12 |
|                           | L posterior insula                  | 19.43 | 11.54 | 22.65 | 12.51 | 1.35 | 0.253 | 0.04 | 20.10 | 12.53 | 21.95 | 11.62 | 0.14 | 0.707 | 0.00 | 0.43 | 0.518 | 0.01 |

|                         |                                     |       |       |       |       |       |       |       |       |       |       |       |       |       |      |       |       |      |
|-------------------------|-------------------------------------|-------|-------|-------|-------|-------|-------|-------|-------|-------|-------|-------|-------|-------|------|-------|-------|------|
|                         | R ventral anterior insula           | 19.48 | 11.90 | 22.60 | 12.15 | 1.91  | 0.177 | 0.05  | 18.19 | 11.50 | 23.95 | 12.04 | 4.12  | 0.050 | 0.11 | 4.26  | 0.047 | 0.11 |
|                         | L ventral anterior insula           | 22.24 | 10.44 | 19.70 | 13.56 | 0.14  | 0.707 | 0.00  | 20.33 | 11.68 | 21.70 | 12.55 | 1.04  | 0.315 | 0.03 | 0.47  | 0.499 | 0.01 |
|                         | R ventral caudate/nucleus accumbens | 18.90 | 11.87 | 23.20 | 11.99 | 0.80  | 0.377 | 0.02  | 18.19 | 10.59 | 23.95 | 12.89 | 3.32  | 0.077 | 0.09 | 3.55  | 0.068 | 0.09 |
|                         | L ventral caudate/nucleus accumbens | 21.10 | 11.84 | 20.90 | 12.43 | 0.35  | 0.560 | 0.01  | 18.19 | 11.22 | 23.95 | 12.32 | 1.77  | 0.192 | 0.05 | 0.16  | 0.688 | 0.01 |
|                         | R substantia nigra                  | 20.57 | 12.11 | 21.45 | 12.14 | 0.31  | 0.581 | 0.01  | 21.19 | 12.07 | 20.80 | 12.19 | 0.01  | 0.944 | 0.00 | 0.02  | 0.897 | 0.00 |
|                         | L substantia nigra                  | 18.05 | 12.10 | 24.10 | 11.32 | 1.69  | 0.203 | 0.05  | 19.05 | 12.98 | 23.05 | 10.78 | 0.18  | 0.674 | 0.01 | 1.00  | 0.325 | 0.03 |
| <b>Prediction Error</b> | R caudate body                      | 18.00 | 12.79 | 24.15 | 10.46 | 7.34  | 0.010 | 0.18  | 18.62 | 12.79 | 23.50 | 10.82 | 3.52  | 0.674 | 0.09 | 6.30  | 0.017 | 0.16 |
|                         | L caudate body                      | 18.24 | 12.48 | 23.90 | 10.99 | 5.81  | 0.022 | 0.15  | 18.52 | 11.77 | 23.60 | 11.94 | 3.61  | 0.069 | 0.10 | 7.78  | 0.009 | 0.19 |
|                         | R caudate head                      | 17.29 | 12.64 | 24.90 | 10.14 | 6.20  | 0.018 | 0.15  | 18.76 | 13.17 | 23.35 | 10.40 | 0.91  | 0.066 | 0.03 | 4.49  | 0.041 | 0.12 |
|                         | L caudate head                      | 18.90 | 12.25 | 23.20 | 11.59 | 0.15  | 0.703 | 0.00  | 18.76 | 12.20 | 23.35 | 11.58 | 3.03  | 0.346 | 0.08 | 2.95  | 0.095 | 0.08 |
|                         | R inferior orbitofrontal cortex     | 18.52 | 12.25 | 23.60 | 11.41 | 3.38  | 0.075 | 0.09  | 20.48 | 11.11 | 21.55 | 13.10 | 0.44  | 0.091 | 0.01 | 1.94  | 0.173 | 0.05 |
|                         | L inferior orbitofrontal cortex     | 21.38 | 11.32 | 20.60 | 12.92 | 0.01  | 0.941 | 0.00  | 21.00 | 11.92 | 21.00 | 12.35 | 0.07  | 0.510 | 0.00 | 0.01  | 0.928 | 0.00 |
|                         | R medial orbitofrontal cortex       | 19.43 | 11.62 | 22.65 | 12.42 | 3.30  | 0.078 | 0.09  | 22.86 | 12.84 | 19.05 | 10.99 | 0.21  | 0.801 | 0.01 | 0.64  | 0.430 | 0.02 |
|                         | L medial orbitofrontal cortex       | 18.86 | 11.84 | 23.25 | 12.00 | 3.95  | 0.055 | 0.10  | 22.81 | 12.18 | 19.10 | 11.76 | 0.02  | 0.646 | 0.00 | 1.18  | 0.286 | 0.03 |
|                         | R middle orbitofrontal cortex       | 21.52 | 11.91 | 20.45 | 12.34 | 0.09  | 0.765 | 0.00  | 22.71 | 11.41 | 19.20 | 12.58 | 1.52  | 0.904 | 0.04 | 1.25  | 0.271 | 0.04 |
|                         | L middle orbitofrontal cortex       | 20.33 | 10.86 | 21.70 | 13.30 | 0.03  | 0.866 | 0.00  | 21.19 | 11.40 | 20.80 | 12.85 | 0.58  | 0.226 | 0.02 | 0.48  | 0.492 | 0.01 |
|                         | R dorsal anterior insula            | 18.95 | 11.66 | 23.15 | 12.22 | 8.19  | 0.007 | 0.19  | 19.43 | 11.25 | 22.65 | 12.78 | 3.19  | 0.451 | 0.09 | 7.68  | 0.009 | 0.18 |
|                         | L dorsal anterior insula            | 19.62 | 12.13 | 22.45 | 11.96 | 1.77  | 0.192 | 0.05  | 20.24 | 12.41 | 21.80 | 11.77 | 1.00  | 0.083 | 0.03 | 2.72  | 0.108 | 0.07 |
|                         | R posterior insula                  | 18.33 | 12.52 | 23.80 | 11.00 | 5.49  | 0.025 | 0.14  | 18.86 | 13.23 | 23.25 | 10.37 | 2.54  | 0.324 | 0.07 | 4.31  | 0.045 | 0.11 |
|                         | L posterior insula                  | 19.57 | 12.02 | 22.50 | 12.06 | 9.34  | 0.004 | 0.22  | 19.00 | 13.21 | 23.10 | 10.45 | 1.90  | 0.121 | 0.05 | 5.09  | 0.031 | 0.13 |
|                         | R ventral anterior insula           | 20.00 | 12.16 | 22.05 | 12.01 | 4.68  | 0.038 | 0.12  | 18.90 | 10.82 | 23.20 | 13.00 | 2.94  | 0.177 | 0.08 | 4.93  | 0.033 | 0.13 |
|                         | L ventral anterior insula           | 20.90 | 11.65 | 21.10 | 12.62 | 1.34  | 0.254 | 0.04  | 20.43 | 11.41 | 21.60 | 12.82 | 0.99  | 0.096 | 0.03 | 1.67  | 0.206 | 0.05 |
|                         | R ventral caudate/nucleus accumbens | 17.24 | 12.54 | 24.95 | 10.23 | 7.45  | 0.010 | 0.18  | 18.90 | 12.67 | 23.20 | 11.10 | 1.20  | 0.280 | 0.03 | 6.39  | 0.016 | 0.16 |
|                         | L ventral caudate/nucleus accumbens | 18.71 | 12.13 | 23.40 | 11.64 | 1.66  | 0.207 | 0.05  | 19.29 | 12.70 | 22.80 | 11.21 | 0.98  | 0.330 | 0.03 | 3.07  | 0.089 | 0.08 |
|                         | R substantia nigra                  | 20.62 | 11.79 | 21.40 | 12.47 | 0.15  | 0.700 | 0.00  | 20.62 | 12.54 | 21.40 | 11.67 | 0.07  | 0.787 | 0.00 | 0.32  | 0.576 | 0.01 |
| L substantia nigra      | 19.81                               | 12.14 | 22.25 | 11.99 | 0.31  | 0.584 | 0.01  | 21.05 | 12.62 | 20.95 | 11.59 | 0.07  | 0.787 | 0.00  | 0.07 | 0.788 | 0.00  |      |

<sup>a</sup>ANCOVA=Analysis of covariance; <sup>b</sup>R=right, L=left; <sup>c</sup>SD=Standard deviation; <sup>d</sup>p-values are adjusted for Bonferroni multiple comparisons; the gray shaded rows indicate significant group difference for regions that also showed significant group effect in the mixed ANOVA.

Table S3: Parameter estimates across scans and task conditions excluding 5 AN<sup>a</sup> patients on antipsychotics

|                     |                                     | Scan 1                  |                 |                         |       |                     |                |                             | Scan 2                  |       |                         |       |          |       |                             | Mixed ANCOVA Group Effect |       |                             |
|---------------------|-------------------------------------|-------------------------|-----------------|-------------------------|-------|---------------------|----------------|-----------------------------|-------------------------|-------|-------------------------|-------|----------|-------|-----------------------------|---------------------------|-------|-----------------------------|
|                     |                                     | Healthy Controls (n=21) |                 | Anorexia Nervosa (n=16) |       | ANCOVA <sup>a</sup> |                |                             | Healthy Controls (n=21) |       | Anorexia Nervosa (n=16) |       | ANCOVA   |       |                             |                           |       |                             |
| Condition           | Region of Interest <sup>b</sup>     | Mean                    | SD <sup>c</sup> | Mean                    | SD    | F (1,31)            | p <sup>d</sup> | η <sup>2</sup> <sub>p</sub> | Mean                    | SD    | Mean                    | SD    | F (1,31) | p     | η <sup>2</sup> <sub>p</sub> | F (1,31)                  | p     | η <sup>2</sup> <sub>p</sub> |
| Expectation         | R caudate body                      | 16.95                   | 11.20           | 21.69                   | 10.02 | 1.40                | 0.246          | 0.04                        | 18.90                   | 10.98 | 19.13                   | 10.97 | 0.43     | 0.519 | 0.01                        | 1.60                      | 0.215 | 0.05                        |
|                     | L caudate body                      | 16.71                   | 11.22           | 22.00                   | 9.82  | 2.05                | 0.162          | 0.06                        | 18.43                   | 11.33 | 19.75                   | 10.45 | 0.03     | 0.868 | 0.00                        | 1.02                      | 0.321 | 0.03                        |
|                     | R caudate head                      | 16.29                   | 10.36           | 22.56                   | 10.68 | 1.85                | 0.184          | 0.06                        | 18.48                   | 12.33 | 19.69                   | 8.81  | 0.04     | 0.847 | 0.00                        | 1.36                      | 0.252 | 0.04                        |
|                     | L caudate head                      | 18.57                   | 11.50           | 19.56                   | 10.20 | 0.50                | 0.484          | 0.02                        | 19.52                   | 11.25 | 18.31                   | 10.56 | 0.57     | 0.456 | 0.02                        | 0.01                      | 0.944 | 0.00                        |
|                     | R inferior orbitofrontal cortex     | 19.05                   | 10.74           | 18.94                   | 11.28 | 0.05                | 0.833          | 0.00                        | 18.86                   | 9.94  | 19.19                   | 12.23 | 0.28     | 0.603 | 0.01                        | 0.47                      | 0.500 | 0.02                        |
|                     | L inferior orbitofrontal cortex     | 18.81                   | 10.74           | 19.25                   | 11.29 | 0.11                | 0.741          | 0.00                        | 19.38                   | 10.01 | 18.50                   | 12.13 | 0.01     | 0.922 | 0.00                        | 0.27                      | 0.605 | 0.01                        |
|                     | R medial orbitofrontal cortex       | 19.52                   | 9.86            | 18.31                   | 12.27 | 0.08                | 0.779          | 0.00                        | 19.48                   | 9.71  | 18.38                   | 12.44 | 0.66     | 0.422 | 0.02                        | 0.92                      | 0.345 | 0.03                        |
|                     | L medial orbitofrontal cortex       | 20.38                   | 9.61            | 17.19                   | 12.32 | 0.33                | 0.568          | 0.01                        | 18.24                   | 9.31  | 20.00                   | 12.80 | 2.43     | 0.129 | 0.07                        | 2.18                      | 0.150 | 0.07                        |
|                     | R middle orbitofrontal cortex       | 18.00                   | 10.69           | 20.31                   | 11.21 | 1.54                | 0.224          | 0.05                        | 20.24                   | 11.23 | 17.38                   | 10.39 | 0.02     | 0.887 | 0.00                        | 0.89                      | 0.352 | 0.03                        |
|                     | L middle orbitofrontal cortex       | 18.14                   | 10.22           | 20.13                   | 11.81 | 0.13                | 0.720          | 0.00                        | 19.38                   | 9.95  | 18.50                   | 12.19 | 0.01     | 0.906 | 0.00                        | 0.18                      | 0.671 | 0.01                        |
|                     | R dorsal anterior insula            | 17.90                   | 10.82           | 20.44                   | 11.01 | 2.94                | 0.097          | 0.09                        | 19.10                   | 11.33 | 18.88                   | 10.49 | 0.31     | 0.580 | 0.01                        | 1.81                      | 0.188 | 0.06                        |
|                     | L dorsal anterior insula            | 18.24                   | 11.30           | 20.00                   | 10.44 | 0.64                | 0.430          | 0.02                        | 20.00                   | 10.71 | 17.69                   | 11.19 | 0.04     | 0.848 | 0.00                        | 0.23                      | 0.639 | 0.01                        |
|                     | R posterior insula                  | 16.52                   | 10.64           | 22.25                   | 10.51 | 4.05                | 0.053          | 0.12                        | 17.48                   | 11.49 | 21.00                   | 9.88  | 2.37     | 0.134 | 0.07                        | 6.39                      | 0.017 | 0.17                        |
|                     | L posterior insula                  | 17.52                   | 11.44           | 20.94                   | 9.98  | 4.27                | 0.047          | 0.12                        | 17.43                   | 11.49 | 21.06                   | 9.86  | 1.25     | 0.273 | 0.04                        | 3.70                      | 0.064 | 0.11                        |
|                     | R ventral anterior insula           | 19.43                   | 11.07           | 18.44                   | 10.83 | 0.71                | 0.405          | 0.02                        | 19.38                   | 10.90 | 18.50                   | 11.06 | 0.00     | 0.997 | 0.00                        | 0.28                      | 0.598 | 0.01                        |
|                     | L ventral anterior insula           | 18.05                   | 11.69           | 20.25                   | 9.79  | 1.22                | 0.278          | 0.04                        | 19.48                   | 11.10 | 18.38                   | 10.78 | 0.03     | 0.870 | 0.00                        | 0.64                      | 0.430 | 0.02                        |
|                     | R ventral caudate/nucleus accumbens | 18.05                   | 11.09           | 20.25                   | 10.69 | 0.13                | 0.718          | 0.00                        | 19.67                   | 12.57 | 18.13                   | 8.31  | 0.33     | 0.571 | 0.01                        | 0.02                      | 0.888 | 0.00                        |
|                     | L ventral caudate/nucleus accumbens | 17.86                   | 11.45           | 20.50                   | 10.11 | 0.29                | 0.592          | 0.01                        | 19.14                   | 11.47 | 18.81                   | 10.28 | 1.43     | 0.240 | 0.04                        | 0.27                      | 0.610 | 0.01                        |
| R substantia nigra  | 18.90                               | 12.44                   | 19.13           | 8.65                    | 0.31  | 0.581               | 0.01           | 20.48                       | 12.79                   | 17.06 | 7.50                    | 0.82  | 0.372    | 0.03  | 0.09                        | 0.766                     | 0.00  |                             |
| L substantia nigra  | 18.33                               | 11.21                   | 19.88           | 10.59                   | 0.06  | 0.809               | 0.00           | 19.52                       | 11.93                   | 18.31 | 9.52                    | 0.00  | 0.962    | 0.00  | 0.00                        | 0.980                     | 0.00  |                             |
| Unexpected omission | R caudate body                      | 17.29                   | 10.71           | 21.25                   | 10.90 | 4.30                | 0.047          | 0.12                        | 18.24                   | 10.11 | 20.00                   | 11.96 | 1.00     | 0.324 | 0.03                        | 4.40                      | 0.044 | 0.12                        |
|                     | L caudate body                      | 15.90                   | 10.26           | 23.06                   | 10.48 | 5.41                | 0.027          | 0.15                        | 16.14                   | 10.57 | 22.75                   | 10.29 | 4.37     | 0.045 | 0.12                        | 9.09                      | 0.005 | 0.23                        |
|                     | R caudate head                      | 18.62                   | 10.57           | 19.50                   | 11.48 | 0.37                | 0.547          | 0.01                        | 17.62                   | 11.18 | 20.81                   | 10.41 | 0.35     | 0.557 | 0.01                        | 0.73                      | 0.400 | 0.02                        |
|                     | L caudate head                      | 18.81                   | 11.57           | 19.25                   | 10.12 | 0.15                | 0.706          | 0.01                        | 16.43                   | 10.93 | 22.38                   | 10.02 | 1.92     | 0.176 | 0.06                        | 1.95                      | 0.172 | 0.06                        |

|                           |                                     |       |       |       |       |      |       |      |       |       |       |       |      |       |      |       |       |      |
|---------------------------|-------------------------------------|-------|-------|-------|-------|------|-------|------|-------|-------|-------|-------|------|-------|------|-------|-------|------|
|                           | R inferior orbitofrontal cortex     | 18.14 | 10.94 | 20.13 | 10.92 | 1.81 | 0.188 | 0.06 | 18.19 | 9.78  | 20.06 | 12.32 | 0.02 | 0.896 | 0.00 | 0.73  | 0.398 | 0.02 |
|                           | L inferior orbitofrontal cortex     | 18.71 | 9.87  | 19.38 | 12.29 | 1.11 | 0.300 | 0.04 | 17.86 | 9.68  | 20.50 | 12.33 | 0.78 | 0.384 | 0.03 | 2.01  | 0.167 | 0.06 |
|                           | R medial orbitofrontal cortex       | 20.24 | 9.23  | 17.38 | 12.75 | 2.11 | 0.156 | 0.06 | 16.14 | 10.66 | 22.75 | 10.16 | 3.12 | 0.087 | 0.09 | 4.91  | 0.034 | 0.14 |
|                           | L medial orbitofrontal cortex       | 19.76 | 9.89  | 18.00 | 12.20 | 2.22 | 0.146 | 0.07 | 16.52 | 10.16 | 22.25 | 11.12 | 3.94 | 0.056 | 0.11 | 5.63  | 0.024 | 0.15 |
|                           | R middle orbitofrontal cortex       | 21.00 | 10.89 | 16.38 | 10.49 | 0.03 | 0.855 | 0.00 | 19.90 | 10.27 | 17.81 | 11.74 | 0.44 | 0.511 | 0.01 | 0.28  | 0.604 | 0.01 |
|                           | L middle orbitofrontal cortex       | 19.62 | 9.92  | 18.19 | 12.20 | 0.30 | 0.588 | 0.01 | 18.43 | 10.93 | 19.75 | 10.99 | 0.03 | 0.874 | 0.00 | 0.15  | 0.697 | 0.01 |
|                           | R dorsal anterior insula            | 17.90 | 11.00 | 20.44 | 10.77 | 2.15 | 0.152 | 0.07 | 16.90 | 10.98 | 21.75 | 10.31 | 1.28 | 0.267 | 0.04 | 3.14  | 0.086 | 0.09 |
|                           | L dorsal anterior insula            | 18.81 | 10.57 | 19.25 | 11.49 | 2.07 | 0.161 | 0.06 | 17.14 | 11.01 | 21.44 | 10.41 | 3.45 | 0.073 | 0.10 | 4.78  | 0.037 | 0.13 |
|                           | R posterior insula                  | 17.14 | 11.37 | 21.44 | 9.88  | 2.48 | 0.126 | 0.07 | 17.71 | 11.38 | 20.69 | 10.16 | 1.62 | 0.212 | 0.05 | 3.41  | 0.075 | 0.10 |
|                           | L posterior insula                  | 17.71 | 11.35 | 20.69 | 10.20 | 4.12 | 0.051 | 0.12 | 16.90 | 12.44 | 21.75 | 7.79  | 2.49 | 0.125 | 0.07 | 4.92  | 0.034 | 0.14 |
|                           | R ventral anterior insula           | 18.00 | 10.60 | 20.31 | 11.32 | 1.24 | 0.273 | 0.04 | 17.29 | 10.38 | 21.25 | 11.32 | 1.17 | 0.288 | 0.04 | 1.73  | 0.198 | 0.05 |
|                           | L ventral anterior insula           | 18.86 | 10.33 | 19.19 | 11.78 | 2.43 | 0.129 | 0.07 | 17.33 | 10.38 | 21.19 | 11.33 | 3.07 | 0.090 | 0.09 | 4.39  | 0.045 | 0.12 |
|                           | R ventral caudate/nucleus accumbens | 17.71 | 10.06 | 20.69 | 11.88 | 0.81 | 0.376 | 0.03 | 16.81 | 10.64 | 21.88 | 10.71 | 2.87 | 0.101 | 0.09 | 3.58  | 0.068 | 0.10 |
|                           | L ventral caudate/nucleus accumbens | 17.76 | 11.23 | 20.63 | 10.40 | 0.12 | 0.731 | 0.00 | 15.33 | 10.72 | 23.81 | 9.20  | 4.00 | 0.054 | 0.11 | 3.46  | 0.072 | 0.10 |
|                           | R substantia nigra                  | 19.33 | 12.06 | 18.56 | 9.32  | 0.64 | 0.432 | 0.02 | 18.19 | 11.64 | 20.06 | 9.92  | 0.98 | 0.330 | 0.03 | 1.67  | 0.206 | 0.05 |
|                           | L substantia nigra                  | 20.10 | 10.52 | 17.56 | 11.40 | 0.08 | 0.784 | 0.00 | 18.24 | 9.69  | 20.00 | 12.41 | 1.12 | 0.297 | 0.04 | 1.26  | 0.271 | 0.04 |
| <b>Unexpected receipt</b> | R caudate body                      | 17.05 | 10.59 | 21.56 | 10.92 | 1.55 | 0.223 | 0.05 | 18.14 | 9.85  | 20.13 | 12.22 | 1.81 | 0.189 | 0.06 | 2.30  | 0.140 | 0.07 |
|                           | L caudate body                      | 17.62 | 10.86 | 20.81 | 10.85 | 1.23 | 0.275 | 0.04 | 16.81 | 11.22 | 21.88 | 9.89  | 3.38 | 0.075 | 0.10 | 2.55  | 0.121 | 0.08 |
|                           | R caudate head                      | 17.62 | 11.20 | 20.81 | 10.37 | 0.90 | 0.350 | 0.03 | 17.48 | 11.07 | 21.00 | 10.51 | 1.17 | 0.288 | 0.04 | 1.38  | 0.249 | 0.04 |
|                           | L caudate head                      | 18.52 | 10.88 | 19.63 | 11.07 | 0.13 | 0.724 | 0.00 | 16.71 | 10.33 | 22.00 | 11.05 | 2.36 | 0.135 | 0.07 | 0.63  | 0.433 | 0.02 |
|                           | R inferior orbitofrontal cortex     | 17.10 | 11.11 | 21.50 | 10.24 | 0.27 | 0.606 | 0.01 | 17.95 | 10.22 | 20.38 | 11.77 | 0.94 | 0.341 | 0.03 | 1.39  | 0.248 | 0.04 |
|                           | L inferior orbitofrontal cortex     | 17.81 | 10.25 | 20.56 | 11.68 | 0.26 | 0.616 | 0.01 | 19.86 | 9.33  | 17.88 | 12.76 | 0.04 | 0.848 | 0.00 | 0.68  | 0.415 | 0.02 |
|                           | R medial orbitofrontal cortex       | 18.81 | 11.61 | 19.25 | 10.07 | 1.46 | 0.237 | 0.05 | 19.10 | 10.26 | 18.88 | 11.87 | 0.68 | 0.417 | 0.02 | 1.65  | 0.208 | 0.05 |
|                           | L medial orbitofrontal cortex       | 18.86 | 11.09 | 19.19 | 10.83 | 1.55 | 0.223 | 0.05 | 19.48 | 9.89  | 18.38 | 12.25 | 1.20 | 0.282 | 0.04 | 3.05  | 0.090 | 0.09 |
|                           | R middle orbitofrontal cortex       | 20.00 | 11.35 | 17.69 | 10.31 | 0.46 | 0.502 | 0.02 | 18.76 | 10.36 | 19.31 | 11.74 | 0.23 | 0.633 | 0.01 | 0.03  | 0.870 | 0.00 |
|                           | L middle orbitofrontal cortex       | 18.76 | 11.09 | 19.31 | 10.81 | 0.56 | 0.459 | 0.02 | 19.71 | 11.01 | 18.06 | 10.86 | 0.07 | 0.798 | 0.00 | 0.12  | 0.736 | 0.00 |
|                           | R dorsal anterior insula            | 16.19 | 10.99 | 22.69 | 9.72  | 7.64 | 0.010 | 0.20 | 17.19 | 10.57 | 21.38 | 11.03 | 8.37 | 0.007 | 0.21 | 13.93 | 0.001 | 0.31 |
|                           | L dorsal anterior insula            | 19.62 | 9.58  | 18.19 | 12.56 | 1.93 | 0.175 | 0.06 | 17.19 | 10.42 | 21.38 | 11.22 | 8.23 | 0.007 | 0.21 | 7.28  | 0.011 | 0.19 |
|                           | R posterior insula                  | 15.33 | 10.15 | 23.81 | 10.01 | 5.83 | 0.022 | 0.16 | 18.29 | 10.92 | 19.94 | 10.98 | 2.50 | 0.124 | 0.08 | 6.56  | 0.015 | 0.18 |
|                           | L posterior insula                  | 17.38 | 11.28 | 21.13 | 10.14 | 1.54 | 0.224 | 0.05 | 18.33 | 11.78 | 19.88 | 9.74  | 0.53 | 0.471 | 0.02 | 1.31  | 0.260 | 0.04 |

|                         |                                     |       |       |       |       |       |       |      |       |       |       |       |      |       |      |       |       |      |
|-------------------------|-------------------------------------|-------|-------|-------|-------|-------|-------|------|-------|-------|-------|-------|------|-------|------|-------|-------|------|
|                         | R ventral anterior insula           | 17.43 | 11.14 | 21.06 | 10.38 | 2.02  | 0.165 | 0.06 | 17.19 | 10.38 | 21.38 | 11.27 | 4.86 | 0.035 | 0.14 | 6.53  | 0.016 | 0.17 |
|                         | L ventral anterior insula           | 20.24 | 9.86  | 17.38 | 12.11 | 0.27  | 0.608 | 0.01 | 18.81 | 10.84 | 19.25 | 11.16 | 1.94 | 0.174 | 0.06 | 1.33  | 0.259 | 0.04 |
|                         | R ventral caudate/nucleus accumbens | 17.90 | 10.65 | 20.44 | 11.22 | 0.93  | 0.344 | 0.03 | 17.43 | 9.58  | 21.06 | 12.28 | 3.24 | 0.082 | 0.10 | 3.82  | 0.060 | 0.11 |
|                         | L ventral caudate/nucleus accumbens | 19.24 | 10.90 | 18.69 | 11.07 | 0.23  | 0.637 | 0.01 | 17.19 | 10.30 | 21.38 | 11.37 | 1.87 | 0.182 | 0.06 | 0.31  | 0.582 | 0.01 |
|                         | R substantia nigra                  | 18.24 | 11.35 | 20.00 | 10.37 | 0.21  | 0.652 | 0.01 | 18.90 | 11.49 | 19.13 | 10.25 | 0.07 | 0.794 | 0.00 | 0.27  | 0.610 | 0.01 |
|                         | L substantia nigra                  | 16.00 | 11.15 | 22.94 | 9.29  | 2.08  | 0.160 | 0.06 | 17.52 | 11.55 | 20.94 | 9.81  | 0.33 | 0.567 | 0.01 | 1.87  | 0.182 | 0.06 |
| <b>Prediction Error</b> | R caudate body                      | 16.38 | 11.61 | 22.44 | 8.91  | 7.02  | 0.013 | 0.19 | 17.24 | 11.47 | 21.31 | 9.79  | 4.43 | 0.044 | 0.13 | 8.53  | 0.006 | 0.22 |
|                         | L caudate body                      | 16.67 | 11.59 | 22.06 | 9.18  | 6.37  | 0.017 | 0.17 | 17.52 | 10.72 | 20.94 | 11.00 | 4.11 | 0.051 | 0.12 | 11.62 | 0.002 | 0.27 |
|                         | R caudate head                      | 16.14 | 11.38 | 22.75 | 9.07  | 6.20  | 0.018 | 0.17 | 17.14 | 12.03 | 21.44 | 8.77  | 1.41 | 0.244 | 0.04 | 5.28  | 0.029 | 0.15 |
|                         | L caudate head                      | 17.95 | 11.48 | 20.38 | 10.09 | 0.28  | 0.604 | 0.01 | 17.14 | 11.21 | 21.44 | 10.13 | 4.65 | 0.039 | 0.13 | 4.01  | 0.054 | 0.12 |
|                         | R inferior orbitofrontal cortex     | 17.62 | 11.15 | 20.81 | 10.45 | 2.76  | 0.107 | 0.08 | 18.95 | 10.46 | 19.06 | 11.63 | 0.97 | 0.331 | 0.03 | 2.80  | 0.104 | 0.08 |
|                         | L inferior orbitofrontal cortex     | 20.14 | 10.14 | 17.50 | 11.83 | 0.01  | 0.921 | 0.00 | 19.00 | 10.82 | 19.00 | 11.19 | 0.37 | 0.548 | 0.01 | 0.28  | 0.599 | 0.01 |
|                         | R medial orbitofrontal cortex       | 17.19 | 10.12 | 21.38 | 11.58 | 3.19  | 0.084 | 0.09 | 20.95 | 11.58 | 16.44 | 9.49  | 0.06 | 0.811 | 0.00 | 0.84  | 0.368 | 0.03 |
|                         | L medial orbitofrontal cortex       | 17.19 | 10.82 | 21.38 | 10.70 | 3.77  | 0.061 | 0.11 | 20.48 | 11.13 | 17.06 | 10.43 | 0.20 | 0.660 | 0.01 | 2.35  | 0.136 | 0.07 |
|                         | R middle orbitofrontal cortex       | 19.86 | 10.94 | 17.88 | 10.92 | 0.12  | 0.732 | 0.00 | 21.19 | 10.14 | 16.13 | 11.34 | 1.01 | 0.322 | 0.03 | 0.63  | 0.434 | 0.02 |
|                         | L middle orbitofrontal cortex       | 19.33 | 10.08 | 18.56 | 12.06 | 0.09  | 0.770 | 0.00 | 19.33 | 10.70 | 18.56 | 11.32 | 0.21 | 0.651 | 0.01 | 0.13  | 0.724 | 0.00 |
|                         | R dorsal anterior insula            | 17.76 | 11.00 | 20.63 | 10.73 | 7.74  | 0.009 | 0.20 | 18.10 | 10.50 | 20.19 | 11.47 | 5.06 | 0.032 | 0.14 | 15.24 | 0.000 | 0.33 |
|                         | L dorsal anterior insula            | 18.43 | 11.19 | 19.75 | 10.64 | 2.09  | 0.158 | 0.06 | 18.90 | 11.46 | 19.13 | 10.30 | 1.91 | 0.176 | 0.06 | 5.52  | 0.025 | 0.15 |
|                         | R posterior insula                  | 17.24 | 11.75 | 21.31 | 9.34  | 5.48  | 0.026 | 0.15 | 17.43 | 12.12 | 21.06 | 8.79  | 3.96 | 0.055 | 0.11 | 6.83  | 0.014 | 0.18 |
|                         | L posterior insula                  | 17.95 | 11.20 | 20.38 | 10.51 | 11.85 | 0.002 | 0.28 | 17.43 | 12.20 | 21.06 | 8.65  | 2.74 | 0.108 | 0.08 | 8.24  | 0.007 | 0.21 |
|                         | R ventral anterior insula           | 18.62 | 10.97 | 19.50 | 10.97 | 4.46  | 0.043 | 0.13 | 17.62 | 10.09 | 20.81 | 11.80 | 3.99 | 0.055 | 0.11 | 8.01  | 0.008 | 0.21 |
|                         | L ventral anterior insula           | 19.10 | 11.02 | 18.88 | 10.92 | 1.48  | 0.234 | 0.05 | 19.10 | 10.89 | 18.88 | 11.09 | 1.91 | 0.177 | 0.06 | 4.76  | 0.037 | 0.13 |
|                         | R ventral caudate/nucleus accumbens | 15.81 | 11.61 | 23.19 | 8.27  | 8.66  | 0.006 | 0.22 | 17.43 | 11.75 | 21.06 | 9.44  | 1.41 | 0.244 | 0.04 | 7.52  | 0.010 | 0.20 |
|                         | L ventral caudate/nucleus accumbens | 17.71 | 11.29 | 20.69 | 10.29 | 2.30  | 0.140 | 0.07 | 17.48 | 12.06 | 21.00 | 8.94  | 1.25 | 0.272 | 0.04 | 3.69  | 0.064 | 0.11 |
|                         | R substantia nigra                  | 17.76 | 10.79 | 20.63 | 11.00 | 0.20  | 0.656 | 0.01 | 18.90 | 11.45 | 19.13 | 10.31 | 0.34 | 0.567 | 0.01 | 0.73  | 0.400 | 0.02 |
|                         | L substantia nigra                  | 17.48 | 10.96 | 21.00 | 10.66 | 0.14  | 0.711 | 0.00 | 19.38 | 11.36 | 18.50 | 10.42 | 0.30 | 0.588 | 0.01 | 0.35  | 0.557 | 0.01 |

<sup>a</sup>ANCOVA=Analysis of covariance; <sup>b</sup>R=right, L=left; <sup>c</sup>SD=Standard deviation; <sup>d</sup>p-values are adjusted for Bonferroni multiple comparisons; the gray shaded rows indicate significant group difference for regions that also showed significant group effect in the mixed ANOVA.

**Table S4. Expectation and Sensitivity to Reward/Punishment Correlations in the anorexia nervosa group**

| SPSRQ scale <sup>a</sup>           | Region of Interest <sup>b</sup>     | <i>r</i> | <i>R</i> <sup>2</sup> | <i>p</i> |
|------------------------------------|-------------------------------------|----------|-----------------------|----------|
| Sensitivity to punishment (scan 1) | L dorsal anterior insula            | 0.437    | 0.191                 | 0.048    |
|                                    | L substantia nigra                  | 0.547    | 0.299                 | 0.010    |
| Sensitivity to reward (scan 1)     | R caudate head                      | 0.489    | 0.239                 | 0.025    |
| Sensitivity to reward (scan 2)     | R inferior orbitofrontal cortex     | 0.468    | 0.219                 | 0.032    |
|                                    | L inferior orbitofrontal cortex     | 0.498    | 0.248                 | 0.021    |
|                                    | R dorsal anterior insula            | 0.526    | 0.277                 | 0.014    |
|                                    | L dorsal anterior insula            | 0.600    | 0.360                 | 0.004    |
|                                    | R ventral anterior insula           | 0.388    | 0.151                 | 0.082    |
|                                    | L ventral anterior insula           | 0.497    | 0.247                 | 0.022    |
|                                    | R ventral caudate/nucleus accumbens | 0.555    | 0.308                 | 0.009    |
|                                    | L ventral caudate/nucleus accumbens | 0.424    | 0.180                 | 0.055    |

<sup>a</sup>SPSRQ=Sensitivity to punishment/sensitivity to reward questionnaire.

<sup>b</sup>L=left, R=right

### **Further studies to identify the effect of high versus low PE brain response and in relation to BMI**

We separated high versus low right caudate PE response in order to test whether the biological measure would be predictive of weight change during treatment. BMI at scan one was indeed predictive of BMI at scan two for the whole group ( $r=.681$ ,  $p<0.001$ ), and it was significantly predictive of BMI at scan two for the high PE response group ( $r=.827$ ,  $p<0.001$ ), but not for the low PE response group ( $r=.522$ ,  $p<0.1$ ). Furthermore, BMI at scan one was not different between high ( $16.4\pm 1.1$ ) and low ( $16.5\pm 1.0$ ) PE response groups ( $p<0.9$ ), and high and low PE response groups could not have been differentiated by BMI at treatment beginning. Days between scans were similar between high ( $42\pm 15$  days) and low ( $42\pm 16$  days) PE response groups ( $p<0.9$ ), however, BMI at discharge tended to be lower in the high PE ( $18.3\pm 1.2$ ) versus low PE response group ( $19.1\pm 0.8$ ) and overall BMI change was lower in the high PE ( $1.97\pm 0.8$ ) versus low PE ( $2.53\pm 0.9$ ). Although the differences in discharge BMI and BMI change were not significant ( $p<0.17$ ,  $p<0.13$ , respectively), the medium to large effect sizes ( $\eta_p^2 = 0.10$ ,  $\eta_p^2 = 0.12$ , respectively) support a group difference in a larger sample. Therefore, the PE value was the

only measure to predict rate of BMI change in treatment and could be an indicator of health of brain function more specific than BMI.

## **Temporal difference learning algorithm and rationale for temporal difference model**

### **learning rate selection**

The predicted value ( $\hat{V}$ ) at any time ( $t$ ) within a trial is calculated as a linear product of weights ( $w_i$ ) and the presence of a conditioned visual stimulus (CS) at time  $t$ , coded in a stimulus representation vector  $x_i(t)$  where each stimulus  $x_i$  is represented separately at each moment in time:

$$V(t) = \sum_i w_i x_i(t)$$

Predicted stimulus value at time  $t$  is updated by comparing the predicted value at time  $t-1$  to that actually observed at time  $t$ , leading to the prediction error  $\delta(t)$ :

$$\delta(t) = r(t) + \gamma \hat{V}(t+1) - \hat{V}(t)$$

where  $r(t)$  is the reward at time  $t$ . The parameter  $\gamma$  is a discount factor, which determines the extent to which rewards arriving sooner are more important than rewards that arrive later during the task, with  $\gamma=0.99$ . The weights  $w_i$  relate to how likely a particular unconditioned reward stimulus (US) follows the associated CS and are updated on each trial according to the correlation between prediction error and the stimulus representation:

$$\Delta w_i = \alpha \sum_t x_i(t) \delta(t)$$

where  $\alpha$  is a learning rate. Between slow and fast learning rates, (0.2, 0.7) a slow  $\alpha=0.2$  was the best fit for study groups. Initial reward values were 1 for Win and 0 for No Win. Trial-to-trial prediction error was regressed with brain activation across all trials within each subject.

Subjects were asked when presented with a geometric shape (CS) to press a button indicating their prediction of which monetary stimuli (US) they would receive next. Due to a technical error, the reaction times for these button responses were only recorded for 14/21 healthy controls,

17/21 anorexia nervosa at scan 1, and 15/21 healthy controls, 18/21AN at scan 2. However, learning rates in the 0.2 ranges have been commonly used in temporal difference model studies (1-6) and are “thought to fall within the naturalistic range of striatal dopamine neurons (7, 8)” (cited in (6)). Nonetheless, we used the method demonstrated by Bray & O’Doherty (2007) and Metereau & Dreher (2013) to compare learning rates (9, 10). Reaction times were normalized with log transformation and then regressed with the prediction value estimated by the temporal difference algorithm using learning rates of either 0.2 (slow) or 0.7 (fast). The slow 0.2 learning rate gave the best fit to the subjects’ behavior for both groups at scan 1 and for anorexia nervosa at scan 2, (where goodness of fit is indicated by sum of squares due to error (SSE) value closer to zero, R-square value closer to one, adjusted R-square (Adj R-sq) value closer to one, and root mean squared error (RMSE) value closer to zero. Although there was a minimally better fit for the 0.7 rate in healthy controls at scan 2, the significance of the minimal difference (~3%) is unclear and we therefore used the 0.2 rate for all comparisons. Furthermore, no significant difference in mean reaction times was found between groups at either scan, or for either group between scans. Additionally, 0.2 for was most consistent with our previous studies and with previous literature (1, 4).

|                         | n  | $\alpha=0.2$ |       |          |          |        | $\alpha=0.7$ |       |          |          |        |
|-------------------------|----|--------------|-------|----------|----------|--------|--------------|-------|----------|----------|--------|
|                         |    | r            | SSE   | R-square | Adj R-sq | RMSE   | r            | SSE   | R-square | Adj R-sq | RMSE   |
| Anorexia nervosa Scan 1 | 14 | -0.25        | 560.2 | 0.024    | 0.024    | 0.406  | 0.19         | 561.8 | 0.021    | 0.021    | 0.407  |
| Anorexia nervosa Scan 2 | 17 | -0.27        | 683.0 | 0.027    | 0.027    | 0.4357 | 0.22         | 683.9 | 0.026    | 0.025    | 0.4360 |
| Healthy controls Scan 1 | 15 | -0.30        | 506.4 | 0.030    | 0.029    | 0.426  | 0.21         | 510.7 | 0.022    | 0.021    | 0.427  |
| Healthy controls Scan 2 | 18 | -0.38        | 514.9 | 0.063    | 0.062    | 0.4144 | 0.32         | 514.2 | 0.064    | 0.064    | 0.4141 |



|                    | Scan 1           |                  |                  |       | Scan 2           |                  |                  |       | Scan1-2<br>(Paired t-test) |       |                  |       |
|--------------------|------------------|------------------|------------------|-------|------------------|------------------|------------------|-------|----------------------------|-------|------------------|-------|
|                    | Healthy controls |                  | Anorexia nervosa |       | Healthy controls |                  | Anorexia nervosa |       | Healthy controls           |       | Anorexia nervosa |       |
|                    | Mean (SD)        | Mean (SD)        | t                | p     | Mean (SD)        | Mean (SD)        | t                | p     | t                          | p     | t                | p     |
| Reaction time (ms) | 821.0<br>(149.6) | 799.2<br>(191.4) | 0.35             | 0.731 | 785.4<br>(178.6) | 756.2<br>(216.9) | 0.42             | 0.680 | 0.58                       | 0.573 | 1.1              | 0.309 |

## References

1. O'Doherty JP, Dayan P, Friston K, Critchley H, Dolan RJ: Temporal difference models and reward-related learning in the human brain. *Neuron*. 2003; 38:329-337
2. Jensen J, Smith AJ, Willeit M, Crawley AP, Mikulis DJ, Vitcu I, et al: Separate brain regions code for salience vs. valence during reward prediction in humans. *Hum Brain Mapp*. 2007; 28:294-302
3. Shott ME, Pryor TL, Yang TT, Frank GKW: Greater insula white matter fiber connectivity in women recovered from anorexia nervosa. *Neuropsychopharmacology*. 2015; 41:1-10
4. Frank GK, Reynolds JR, Shott ME, Jappe L, Yang TT, Tregellas JR, et al: Anorexia nervosa and obesity are associated with opposite brain reward response. *Neuropsychopharmacology*. 2012; 37:2031-2046
5. Seymour B, O'Doherty JP, Koltzenburg M, Wiech K, Frackowiak R, Friston K, et al: Opponent appetitive-aversive neural processes underlie predictive learning of pain relief. *Nat Neurosci*. 2005; 8:1234-1240
6. Robinson OJ, Overstreet C, Charney DR, Vytal K, Grillon C: Stress increases aversive prediction error signal in the ventral striatum. *Proc Natl Acad Sci U S A*. 2013; 110:4129-4133
7. Seymour B, O'Doherty JP, Dayan P, Koltzenburg M, Jones AK, Dolan RJ, et al: Temporal difference models describe higher order learning in humans. *Nature*. 2004; 429:664-667
8. O'Doherty JP, Buchanan TW, Seymour B, Dolan RJ: Predictive neural coding of reward preference involves dissociable responses in human ventral midbrain and ventral striatum. *Neuron*. 2006; 49:157-166
9. Bray S, O'Doherty J: Neural coding of reward-prediction error signals during classical conditioning with attractive faces. *J Neurophysiol*. 2007; 97:3036-3045
10. Metereau E, Dreher JC: Cerebral correlates of salient prediction error for different rewards and punishments. *Cereb Cortex*. 2013; 23:477-487
